# Supplementary material
Source: PubMed Central journal article supplement (PMC5940522)
Supplement: NIHMS951873-supplement-1.pdf [file NIHMS951873-supplement-1.pdf]

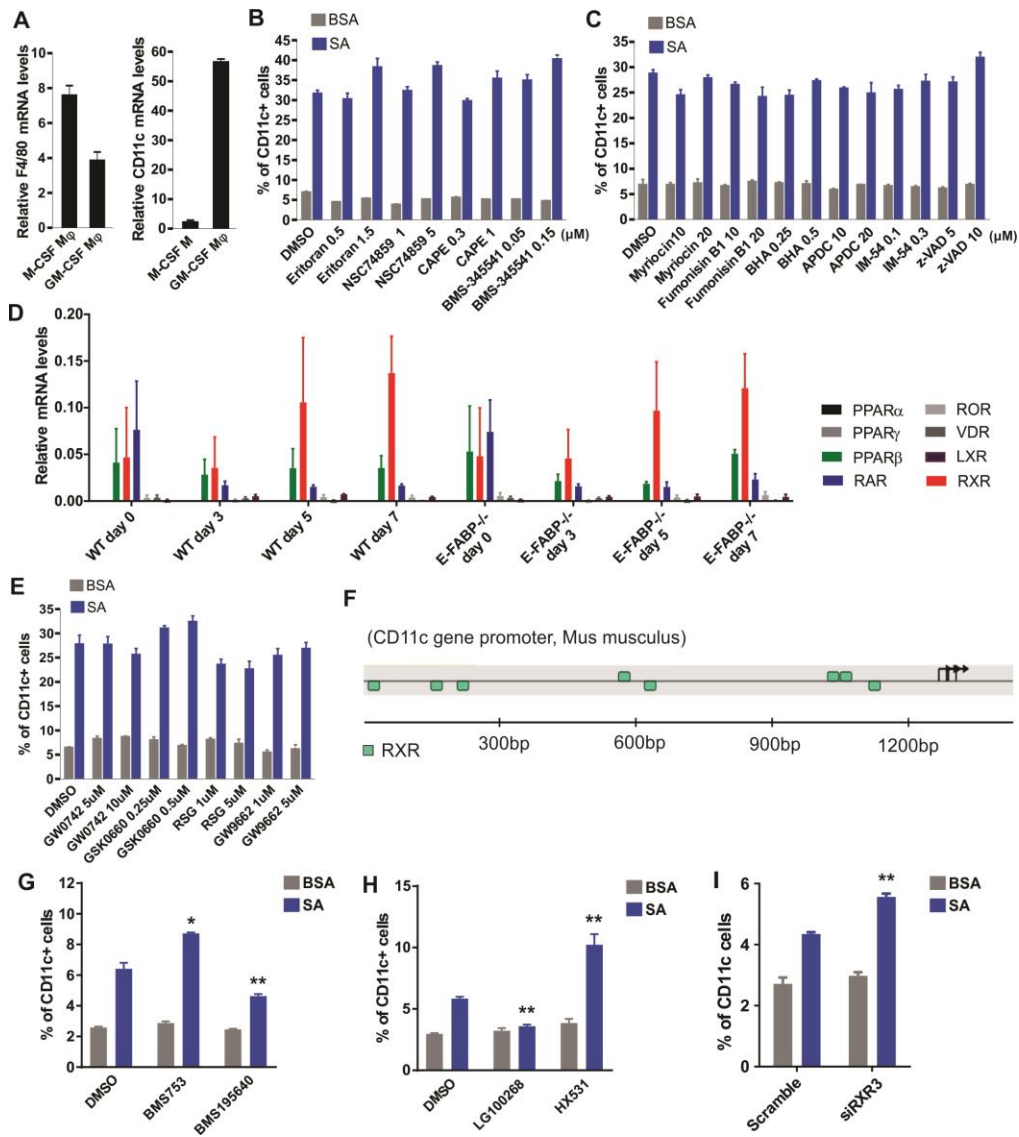

**Supplemental Figure 1 Evaluation of expression and functional role of nuclear receptors in SA-induced CD11c expression in macrophages.** (A) Comparison of expression of F4/80 and CD11c between M-CSF- and GM-CSF-induced bone marrow macrophages by realtime PCR. (B-C) Flow cytometric analyses of SA-induced CD11c expression on immortalized macrophages treated with indicated concentrations of various inhibitors targeting SA/TLR/NKκB pathways (B) or SA/ceramide/cell stress pathways (C). (D) Realtime PCR analysis of common nuclear receptor expression in bone marrow-derived macrophages differentiated by M-CSF at the indicated time points. (E) Flow cytometric analyses of SA-induced CD11c expression in immortalized macrophages treated with indicated concentrations of agonists and antagonists of PPAR families. (F) Analysis of RXR binding sites on the CD11c promoter region using MatInspector. (G) Flow cytometric analysis of CD11c+ cell percentage in BSA- or SA-treated primary BMMs in the presence of RAR agonist (BMS753) or antagonist (BMS195640) for 48h. (H) Flow cytometric analysis of CD11c+ cell percentage in BSA- or SA-treated primary BMMs in the presence of RXR agonist (LG100268) or antagonist (HX531) for 48h. (I) Primary BMMs transfected with RXR siRNA3 or scramble controls were stimulated with BSA or SA (100μM) for 24h. CD11c+ cell percentage was analyzed by flow cytometry (\*,  $p < 0.05$ ; \*\*  $p < 0.01$  as compared to the DMSO control).

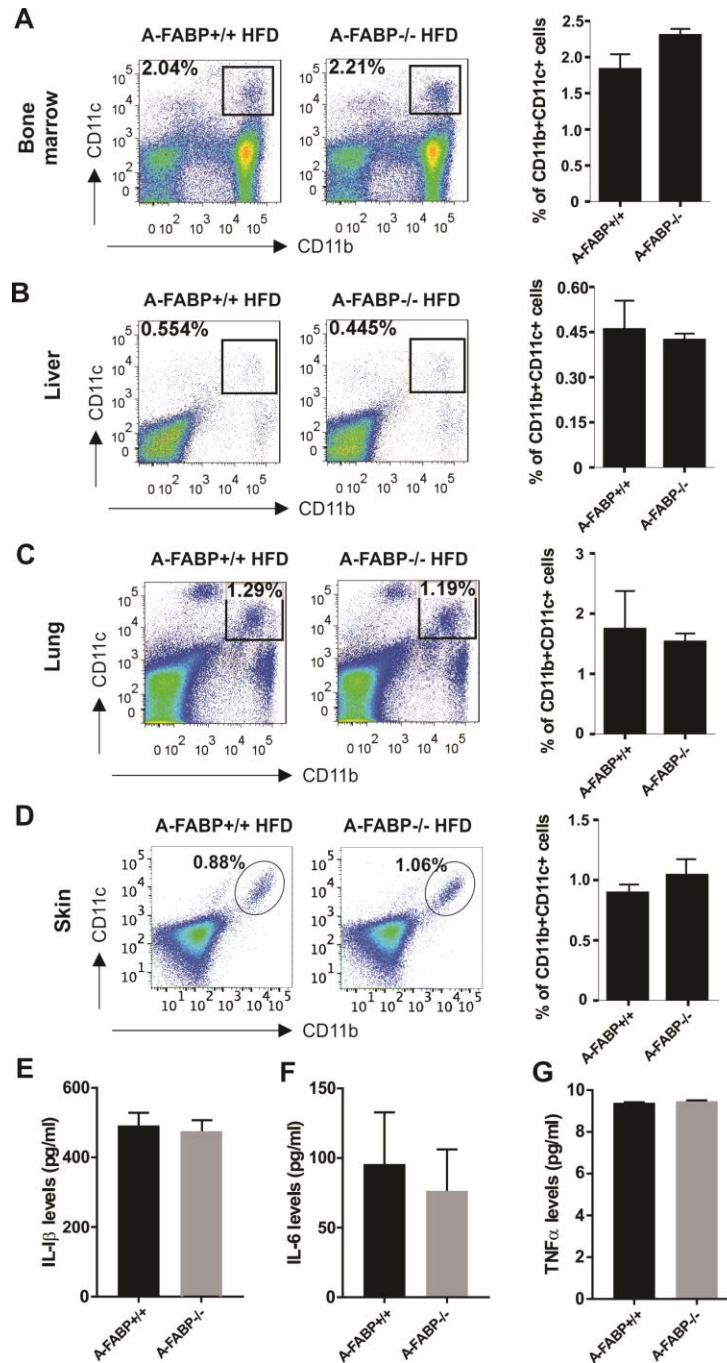

**Supplemental Figure 2 A-FABP deficiency has no impact on CD11c<sup>+</sup> macrophage differentiation in obese mice** WT and A-FABP<sup>-/-</sup> mice were fed on HFD (60% fat) for 20 weeks. Different tissues or organs were collected, respectively, from the obese WT and A-FABP<sup>-/-</sup> mice (n=3) for analysis of the presence of CD11b<sup>+</sup>CD11c<sup>+</sup> macrophages. (A-D) Analysis of CD11b<sup>+</sup>CD11c<sup>+</sup> macrophages in bone marrow (A), liver (B), lung (C) and skin (D) by flow cytometric surface staining. Average percentage of CD11c<sup>+</sup> cells is shown in the right panel of each figure. (E-G) Measurement of cytokine levels of IL-6, IL-1 $\beta$  and TNF $\alpha$  in the serum collected from obese WT and A-FABP<sup>-/-</sup> mice by ELISA. Data shown as mean $\pm$ SEM are representative of at least two independent experiments.

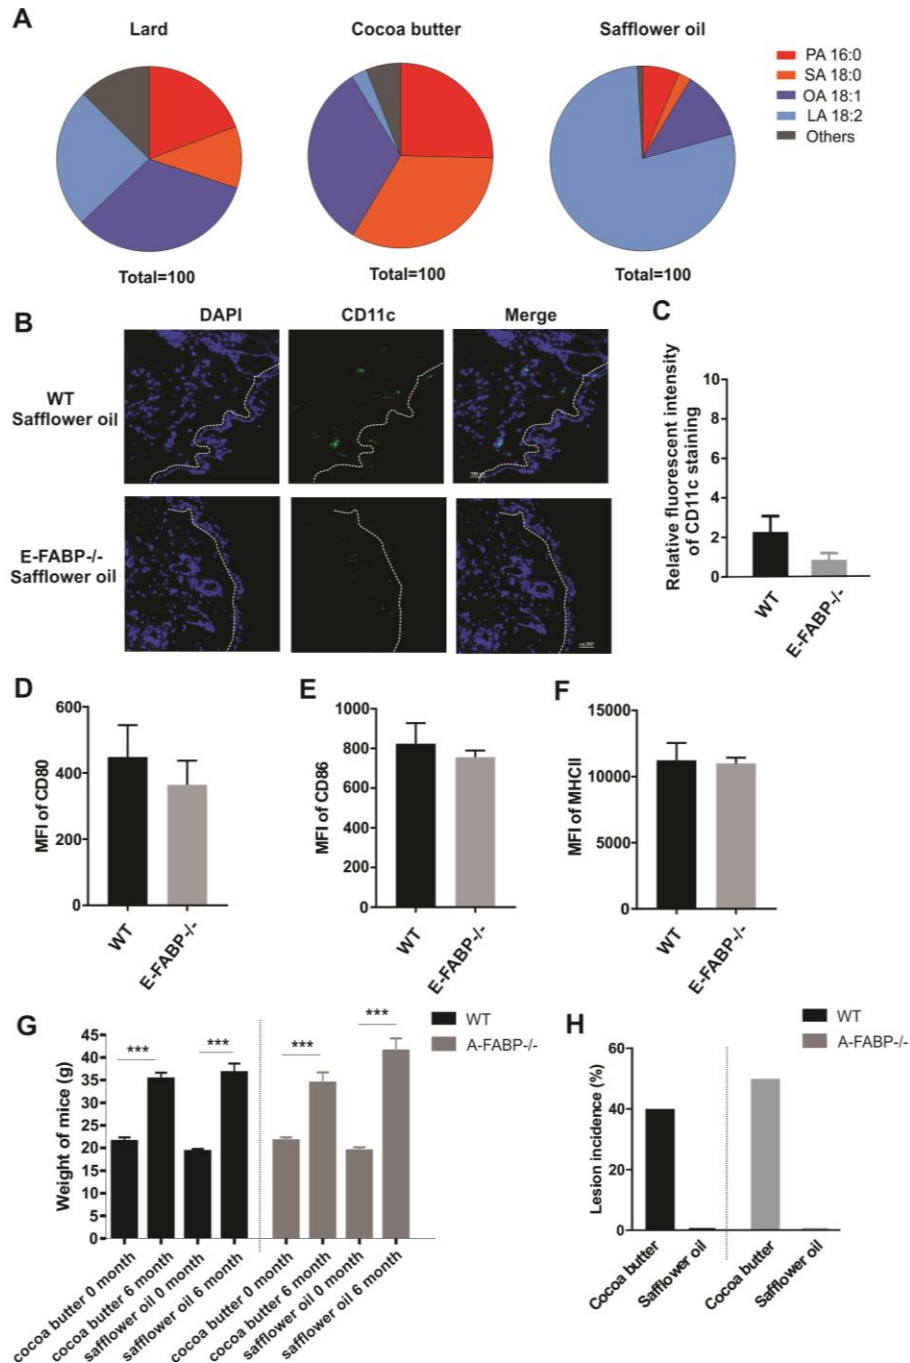

**Supplemental Figure 3 A-FABP is not a major player in the cocoa butter diet-induced skin lesions**

(A) Fatty acid compositions in different HFDs. (B-C) Confocal analysis of CD11c macrophages (green color) accumulation in the skin tissue of WT and E-FABP<sup>-/-</sup> mice fed with safflower oil for 9 months. Relative CD11c fluorescent intensity is shown in panel C. (D-F) Flow cytometric analyses of CD80 (D), CD86 (E) and MHCII (F) expression on CD11c<sup>+</sup> macrophages in the skin of WT and E-FABP<sup>-/-</sup> mice fed with the safflower oil diet for 9 months. (G) Weight of WT mice and A-FABP<sup>-/-</sup> mice before and after cocoa butter diet (45% fat) (n=15/WT mice, n=14/A-FABP<sup>-/-</sup> mice) and safflower diet (45% fat) (n=9/WT mice, n=12/A-FABP<sup>-/-</sup> mice) for 6 months. (H) The incidence of skin lesions in WT and A-FABP<sup>-/-</sup> mice fed with cocoa butter diet or safflower oil diet for 9 months. Data are shown as mean ± SEM (\*\*\*)p<0.001).

**Supplemental Table 1 Sequences of siRNAs, PCR primers used in experiments**

| Sequences of siRNAs, PCR primers and miRs used in experiments |                                                  |          |                             |
|---------------------------------------------------------------|--------------------------------------------------|----------|-----------------------------|
|                                                               | Name                                             |          | Oligo sequences (5' to 3')  |
| siRNA                                                         | <i>RXRa</i> siRNA(Duplex sequences) and scramble | siRNA1   | UGGAGUGAUUUCUCAGGGCAUCUUUGG |
|                                                               |                                                  | siRNA2   | UCAGGUCUUUGCGUACUGUCCUCUUGA |
|                                                               |                                                  | siRNA3   | GUGUUUGCAGUACGCUUCUAGUGACGC |
|                                                               |                                                  | scramble | GAUUCUCCGAACGUGUCACGUTT     |
| qPCR                                                          | <i>A-FABP</i>                                    | forward  | TTTCCTTCAAACCTGGGCGTG       |
|                                                               |                                                  | reverse  | CATTCCACCACCAGTTGTC         |
|                                                               | <i>E-FABP</i>                                    | forward  | AACCGAGAGCACAGTGAAG         |
|                                                               |                                                  | reverse  | ACACTCCACGATCATCTTCC        |
|                                                               | <i>CD11b</i>                                     | forward  | ATCAGGGCGCTGTCTACATT        |
|                                                               |                                                  | reverse  | GGCTCTGAGCAGCAGAAGAT        |
|                                                               | <i>CD11c</i>                                     | forward  | GAGGACATGAGGGACGCTTA        |
|                                                               |                                                  | reverse  | GAACAAAGAGATGCCCAAA         |
|                                                               | <i>F4/80</i>                                     | forward  | CTGAGGATGAATTCCCGTGT        |
|                                                               |                                                  | reverse  | GTCTCGGATGCTTCCACAAT        |
|                                                               | <i>IL-6</i>                                      | forward  | ACCTGTCTATAACCACTTC         |
|                                                               |                                                  | reverse  | GCATCATCGTTGTTTCATA         |
|                                                               | <i>IL1<math>\beta</math></i>                     | forward  | GAAATGCCACCTTTTGACAGTG      |
|                                                               |                                                  | reverse  | TGGATGCTCTCATCAGGACAG       |
|                                                               | <i>TNF<math>\alpha</math></i>                    | forward  | GAACTGGCAGAAGAGGCACT        |
|                                                               |                                                  | reverse  | AGGGTCTGGGCATAGAACT         |
|                                                               | <i>IL-10</i>                                     | forward  | CAGCCGGGAAGACAATAACT        |
|                                                               |                                                  | reverse  | TCATTTCCGATAAGGCTTGG        |
|                                                               | <i>IL-12</i>                                     | forward  | CCTCAGTTTGGCCAGGGTC         |
|                                                               |                                                  | reverse  | CAGGTTTCGGGACTGGCTAAG       |
|                                                               | <i>IL-18</i>                                     | forward  | GCCTCAAACCTTCCAAATCA        |
|                                                               |                                                  | reverse  | GTGAAGTCGGCCAAAGTTGT        |
|                                                               | <i>IFN-<math>\alpha</math></i>                   | forward  | ACTGGCCAACCTGCTCTCTA        |
|                                                               |                                                  | reverse  | GATGGCTTGAGCCTTCTTGA        |
|                                                               | <i>IFN-<math>\beta</math></i>                    | forward  | CAGCTCCAAGAAAGGACGAAC       |
|                                                               |                                                  | reverse  | GGCAGTGTAACCTTCTTGCAT       |
|                                                               | <i>FATP1</i>                                     | forward  | GCTTCAACAGCCGATCCTC         |
|                                                               |                                                  | reverse  | TCGTCCATCACTAGCACGTC        |
|                                                               | <i>FATP2</i>                                     | forward  | TCAAAGTCCCAAGGTGAG          |
|                                                               |                                                  | reverse  | CCACCGGAAAGTATCTCAA         |
|                                                               | <i>FATP3</i>                                     | forward  | AGTGGCTGAGGTCTTGGAGA        |
|                                                               |                                                  | reverse  | TTGGCCATCCTAACCTTCTG        |
|                                                               | <i>FATP4</i>                                     | forward  | CATCTGGACCTCTTCTGGA         |
|                                                               |                                                  | reverse  | GGGGAGCAGTCA TAGACAA        |
|                                                               | <i>ACSL1</i>                                     | forward  | CCGGATGTTGACAGAATTT         |
|                                                               |                                                  | reverse  | GTGATCATCAGCCGACTTT         |
|                                                               | <i>iNOS</i>                                      | forward  | CACCAACAATGGCAACATCAG       |
|                                                               |                                                  | reverse  | GTGATGCACAACCTGGGTG         |
|                                                               | <i>HPRT1</i>                                     | forward  | AGCCTAAGATGAGCGCAAGT        |
|                                                               |                                                  | reverse  | TTACTAGGCAGATGGCCACA        |
| <i>RXRa</i>                                                   | Qiagen RT2 Primer Assay                          |          |                             |
| <i>FABP1, 2, 3, 6, 7, 9, 12</i>                               | All from Qiagen RT2 Primer Assay                 |          |                             |
| <i>PPAR<math>\alpha</math></i>                                | Qiagen RT2 Primer Assay                          |          |                             |
| <i>PPAR<math>\beta</math></i>                                 | Qiagen RT2 Primer Assay                          |          |                             |
| <i>PPAR<math>\delta</math></i>                                | Qiagen RT2 Primer Assay                          |          |                             |
| <i>RAR</i>                                                    | Qiagen RT2 Primer Assay                          |          |                             |
| <i>VDR</i>                                                    | Qiagen RT2 Primer Assay                          |          |                             |
| <i>LXR</i>                                                    | Qiagen RT2 Primer Assay                          |          |                             |
| <i>ROR</i>                                                    | Qiagen RT2 Primer Assay                          |          |                             |
| <i>CD36</i>                                                   | Qiagen RT2 Primer Assay                          |          |                             |
